# Supplementary material for: Hydrothermal Synthesis of Polyhedral Nickel Sulfide by Dual Sulfur Source for Highly-Efficient Hydrogen Evolution Catalysis
Source: PubMed Central journal article supplement (PMC7692512; doi:10.3390/nano10112115), 2020-10-24
Supplement: nanomaterials-10-02115-s001.pdf [file nanomaterials-10-02115-s001.pdf]

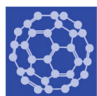

## Supplementary Information

# Hydrothermal synthesis of polyhedral nickel sulfide by dual sulfur source for high-efficient hydrogen evolution catalysis

Yuan Gao <sup>1</sup>, Ka Wang <sup>1</sup>, Zixia Lin <sup>2</sup>, Haizeng Song <sup>3</sup>, Xiaomeng Duan <sup>4</sup>, Zehui Peng <sup>1</sup> and Shancheng Yan <sup>1,\*</sup>

<sup>1</sup> School of Geography and Biological Information, Nanjing University of Posts and Telecommunications, Nanjing 210023, China; 1218063835@njupt.edu.cn (Y.G.); 1217063729@njupt.edu.cn (K.W.); 1019172222@njupt.edu.cn (Z.P.)

<sup>2</sup> Testing center, Yangzhou University, Yangzhou 225009, China; zxlin@yzu.edu.cn

<sup>3</sup> School of Electronic Science and Engineering, Nanjing University, Nanjing 210093, China; dg1823028@smail.nju.edu.cn

<sup>4</sup> Jiangsu National Synergetic Innovation Center for Advanced Materials (SICAM), Institute of Advanced Materials (IAM), Nanjing University of Posts & Telecommunications, Nanjing 210023, China; 1218063822@njupt.edu.cn

\* Correspondence: yansc@njupt.edu.cn

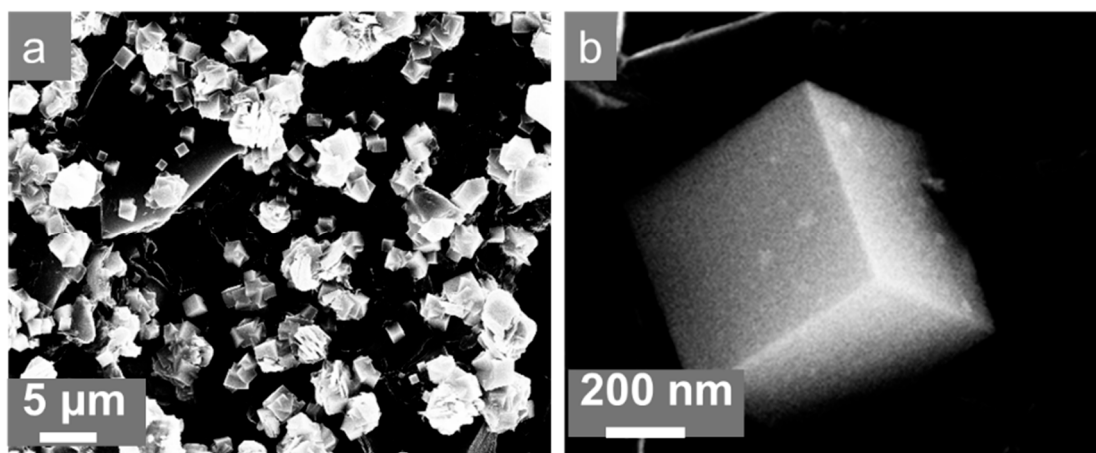

**Figure S1.** (a) and (b) are SEM images of NiS<sub>2</sub> fabricated by MPS as the only sulfur source.

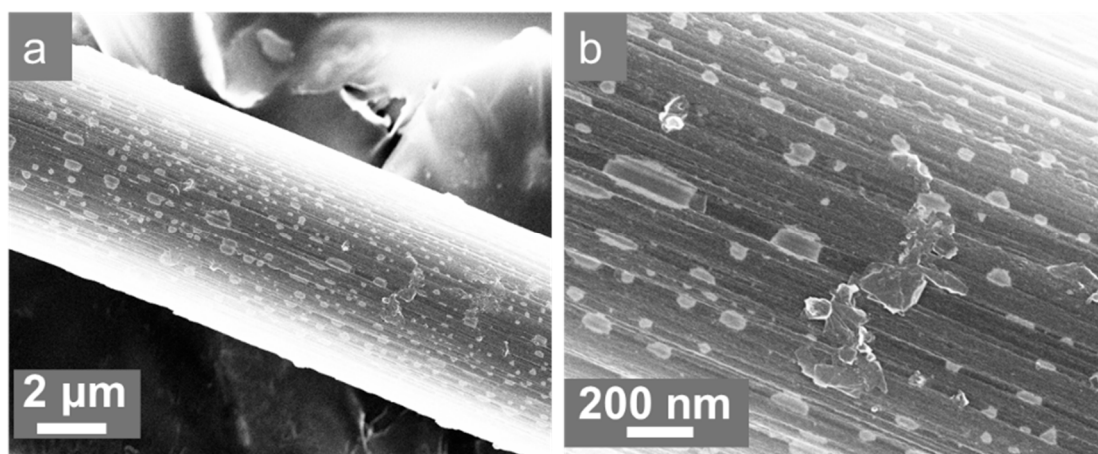

**Figure S2.** (a) and (b) are SEM patterns of the product which prepared by sulfur powder only.

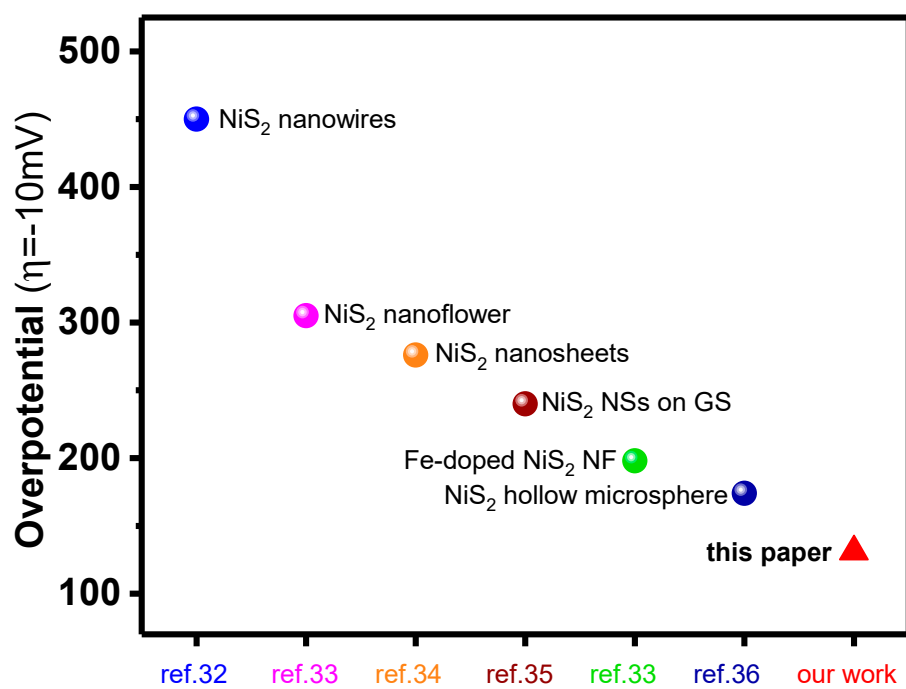

Figure S3. Contrast of HER activity of electrocatalysts of similar materials.
